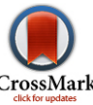

## Correction

# Correction: Multi-Centre Evaluation of the Determine HIV Combo Assay when Used for Point of Care Testing in a High Risk Clinic-Based Population

The *PLOS ONE* Staff

In the Results subsection of the Abstract, there is an error in the first sentence. Please see the corrected sentence below:

“Of 3190 evaluation specimens, 39 were confirmed as HIV-positive (12 with early infection) and 3151 were HIV-negative by reference testing.”

## Reference

1. Conway DP, Holt M, McNulty A, Couldwell DL, Smith DE, et al. (2014) Multi-Centre Evaluation of the Determine HIV Combo Assay when Used for Point of Care Testing in a High Risk Clinic-Based Population. *PLoS ONE* 9(4): e94062. doi:10.1371/journal.pone.0094062

**Citation:** The *PLOS ONE* Staff (2014) Correction: Multi-Centre Evaluation of the Determine HIV Combo Assay when Used for Point of Care Testing in a High Risk Clinic-Based Population. *PLoS ONE* 9(7): e103399. doi:10.1371/journal.pone.0103399

**Published:** July 16, 2014

**Copyright:** © 2014 The *PLOS ONE* Staff. This is an open-access article distributed under the terms of the Creative Commons Attribution License, which permits unrestricted use, distribution, and reproduction in any medium, provided the original author and source are credited.
